# Supplementary material
Source: PubMed Central journal article supplement (PMC6393613)
Supplement: supp_RA118.006082_141093_2_supp_262235_pkt48y.pdf [file supp_RA118.006082_141093_2_supp_262235_pkt48y.pdf]

**Crystal structure of the *Vibrio cholerae* VqmA–ligand–DNA complex provides insight into ligand-binding mechanisms relevant for drug design**

Hai Wu, Minjun Li, Haojie Guo, Huan Zhou, Bing Li, Qin Xu, Chunyan Xu, Feng Yu\* and Jianhua He\*

**List of the supplementary data**

**Table S1.** Data collection and refinement statistics

**Table S2.** Target dsDNA sequences of different lengths

**Table S3.** DPO-binding capacity of WT and mutant VqmA

**Table S4.** Target dsDNA-binding capacity of Apo and DPO-binding VqmA

**Figure S1.** Structural comparison of the PAS domain of VqmA and other PAS domains.

**Figure S2.** ITC profiles for the interactions of WT VqmA and its mutants with DPO.

**TABLES**

**Table S1.** Data collection and refinement statistics

|                                     | VqmA complex              | Se-Met                    |
|-------------------------------------|---------------------------|---------------------------|
| <b>Data collection</b>              |                           |                           |
| Space group                         | $P2_12_12_1$              | $I2_12_12_1$              |
| a, b, c(Å)                          | 52.78 108.98 214.32       | 52.73 105.54 209.36       |
| $\alpha, \beta, \gamma(^{\circ})$   | 90.00 90.00 90.00         | 90.00 90.00 90.00         |
| Wavelength(Å)                       | 0.97915                   | 0.97915                   |
| Resolution(Å)                       | 43.33 - 2.51(2.58 - 2.51) | 52.34 - 2.85(2.92 - 2.85) |
| CC <sub>1/2</sub>                   | 0.998(0.790)              | 0.999(0.760)              |
| Unique reflections                  | 43223(3120)               | 14020(1030)               |
| $R_{\text{meas}}(\%)^a$             | 7.7(175.3)                | 12.5(190.7)               |
| Mean $I/\sigma(I)^a$                | 18.9(1.8)                 | 17.1(2.1)                 |
| Completeness( $\%)^a$               | 99.6(99.6)                | 99.2(99.1)                |
| Multiplicity <sup>a</sup>           | 13.1(13.2)                | 19.0(20.6)                |
| <b>Refinement</b>                   |                           |                           |
| Resolution(Å)                       | 43.33 - 2.51              |                           |
| $R_{\text{work}}/R_{\text{free}}^b$ | 0.1915/0.2294             |                           |
| No.atoms                            |                           |                           |
| Protein                             | 3575                      |                           |
| DNA/Ligand                          | 732/18                    |                           |
| Water                               | 6                         |                           |
| Average B factors (Å <sup>2</sup> ) |                           |                           |
| Protein                             | 90.69                     |                           |
| DNA                                 | 125.29                    |                           |
| Ligand                              | 69.14                     |                           |
| Water                               | 69.95                     |                           |
| Wilson B factor (Å <sup>2</sup> )   | 78.30                     |                           |
| R.m.s. deviations                   |                           |                           |
| Bond lengths(Å)                     | 0.005                     |                           |
| Bond angles(°)                      | 0.689                     |                           |
| Ramachandran plot                   |                           |                           |
| Favored (%)                         | 97.31                     |                           |
| Allowed (%)                         | 2.47                      |                           |
| Outliers (%)                        | 0.22                      |                           |

<sup>a</sup> The values in parentheses are for the outermost shell.

<sup>b</sup>  $R_{\text{free}}$  is the  $R_{\text{work}}$  based on 5% of the data excluded from the refinement.

$R_{\text{meas}} = \frac{\sum_{hkl} \sqrt{n/(n-1)} \sum_{i=1}^n |I_i(hkl) - \langle I(hkl) \rangle|}{\sum_{hkl} \sum_i I_i(hkl)}$ , where  $\langle I(hkl) \rangle$  is the mean intensity of a set of equivalent reflections.

$R_{\text{work}} = \frac{\sum_{hkl} ||F_{\text{obs}}| - |F_{\text{calc}}||}{\sum_{hkl} |F_{\text{obs}}|}$  where  $F_{\text{obs}}$  and  $F_{\text{calc}}$  are observed and calculated structure factors, respectively.

**Table S2.** Target dsDNA sequences of different lengths

| Sequence name | DNA sequence                 |
|---------------|------------------------------|
| vqmR18        | 5'- AGGGGGGATTTCCTCCCT -3'   |
| vqmR20        | 5'- AAGGGGGGATTTCCTCCCTT -3' |

**Table S3.** DPO-binding capacity of WT and mutant VqmA

| VqmA  | $K_d$ ( $\mu$ M) | $\Delta H$ (kJ/mol) | $\Delta G$ (kJ/mol) | $-T\Delta S$ (kJ/mol) |
|-------|------------------|---------------------|---------------------|-----------------------|
| WT    | 2.56             | -46.3               | -31.9               | 14.4                  |
| Y36F  | 7.86             | -54.2               | -29.2               | 25.0                  |
| F67A  | No binding       | N/A                 | N/A                 | N/A                   |
| F67I  | 22.7             | -39.8               | -26.5               | 13.2                  |
| Q70A  | No binding       | N/A                 | N/A                 | N/A                   |
| F99A  | 35.2             | -22.4               | -25.5               | -3.08                 |
| F99I  | 3.56             | -43.1               | -31.1               | 12.0                  |
| K101  | No binding       | N/A                 | N/A                 | N/A                   |
| S229A | 23.0             | -61.5               | -26.5               | 35.0                  |

The VqmA–DPO binding affinity was determined using the ITC assay and is represented by the dissociation constant,  $K_d$ .

**Table S4.** Target dsDNA-binding capacity of Apo and DPO-binding VqmA

| VqmA        | $K_d$ (nM) | $\Delta H$ (kJ/mol) | $\Delta G$ (kJ/mol) | $-T\Delta S$ (kJ/mol) |
|-------------|------------|---------------------|---------------------|-----------------------|
| Apo         | 9.73       | -111                | -45.8               | 65.6                  |
| DPO-binding | 10.3       | -137                | -45.6               | 91.7                  |

The VqmA–dsDNA binding affinity was determined using the ITC assay and is represented by the dissociation constant,  $K_d$ .

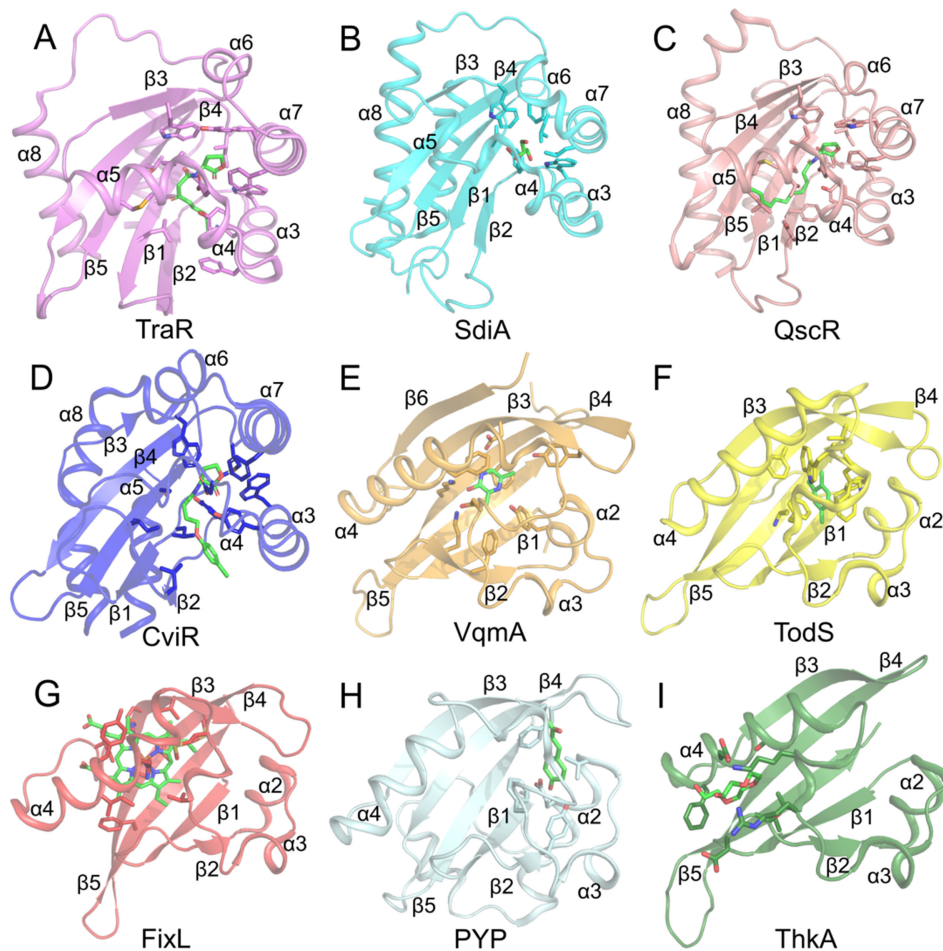

**Figure S1.** Structural comparison of the PAS domain of VqmA and other PAS domains. Ligands are represented as green stick models, and residues involved in ligand interaction are shown as stick models. (A) The PAS domain of TraR (PDB ID: 1L3L) is in violet. (B) The PAS domain of SdiA (PDB ID: 4LGW) is in cyan. (C) The PAS domain of QscR (PDB ID: 6CC0) is in pink. (D) The PAS domain of CviR (PDB ID: 3QP5) is in blue. (E) The PAS domain of VqmA is in orange. (F) The PAS domain of TodS (PDB ID: 5HWW) is in yellow. (G) The PAS domain of FixL (PDB ID: 1DP6) is in red. (H) The PAS domain of PYP (PDB ID: 1F98) is in silver. (I) The PAS domain of ThkA (PDB ID: 3A0S) is in dark green.

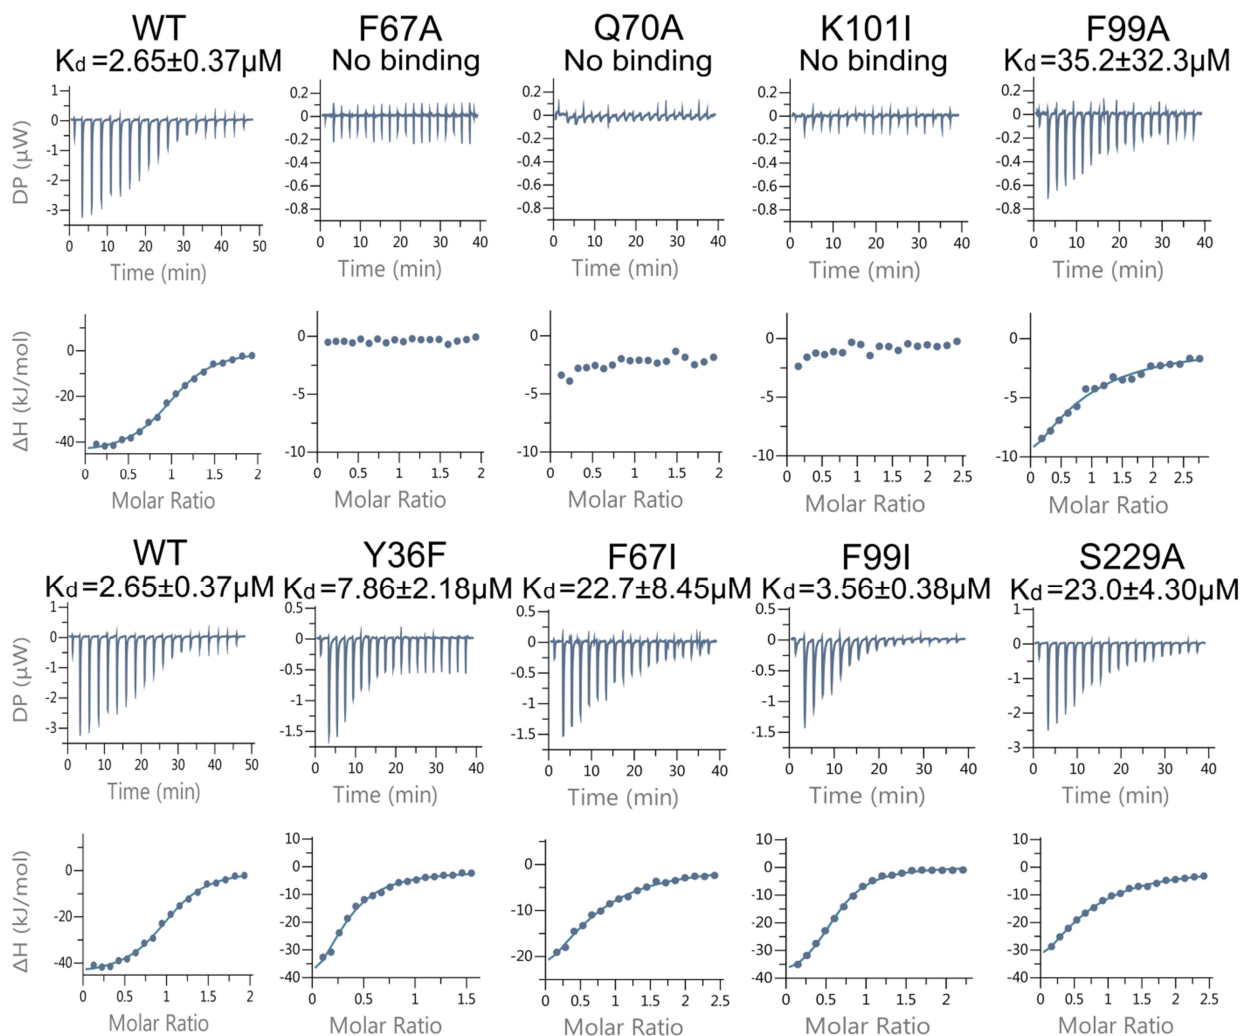

**Figure S2.** ITC profiles for the interactions of WT VqmA and its mutants (Y36F, F67A, F67I, Q70A, F99A, F99I, K101I, S229A) with DPO.  $K_d$ , dissociation constant. In order to better show the differences between WT VqmA and its mutants in ligand binding ability, the ITC profile of WT VqmA, which is shown in figure 5D, is listed in the first line of this figure.
